# Supplementary material for: Reporting Hall effect measurements of charge carrier mobility in emerging materials
Source: Springer Nature journal article supplement (doi:10.1038/s41928-024-01198-w), 2024-07-17
Supplement: 41928_2024_1198_MOESM1_ESM.pdf [file 41928_2024_1198_MOESM1_ESM.pdf]

# Reporting Hall effect measurements of charge carrier mobility in emerging materials

---

In the format provided by the authors and unedited

---

**Table 1** below lists room-temperature Hall mobilities,  $\mu_{\text{Hall}}$ , reported for the three groups of materials (metal-oxide or metal-halide perovskites, conjugated polymers, and crystalline small-molecule organic semiconductors) in the period between 2003 and 2023. The listed  $\mu_{\text{Hall}}$  are those reported as extracted directly from measurements, without any normalization or theoretical adjustments. The Table also lists the Hall reliability score,  $r_{\text{Hall}}$ , calculated for each paper according to the *checklist* of Hall effect measurements introduced in this article. This parameter (an integer between 0 and 16) is designed as a metric for evaluating the completeness, reliability, and potential reproducibility of Hall mobility measurements reported in papers. The Table is not intended to provide an exhaustive list of literature on each class of materials. A detailed methodology of  $r_{\text{Hall}}$  calculation is given after the Table.

**Table 1.** Papers (with hyperlinks) reporting a Hall mobility,  $\mu_{\text{Hall}}$ , in perovskites, conjugated polymers, and crystalline small-molecule organic semiconductors, published in 2003 - 2023,<sup>[1-110]</sup> with the Hall reliability score  $r_{\text{Hall}}$  calculated according to the procedure described below. For each paper, the highest reported room-temperature  $\mu_{\text{Hall}}$  is listed. For papers reporting Hall effect measurements at other temperatures,  $r_{\text{Hall}}$  is still calculated, but  $\mu_{\text{Hall}}$  is omitted from the Table.

| Paper reporting Hall-effect mobility                                    | Material                                                                       | $\mu_{\text{Hall}}$<br>$\text{cm}^2\text{V}^{-1}\text{s}^{-1}$ | $r_{\text{Hall}}$ | Ref. |
|-------------------------------------------------------------------------|--------------------------------------------------------------------------------|----------------------------------------------------------------|-------------------|------|
| <b>Perovskites</b>                                                      |                                                                                |                                                                |                   |      |
| <a href="#">E. Bellingeri, et al. <i>J. Appl. Phys.</i> (2003)</a>      | SrTiO <sub>3</sub>                                                             | 3.9                                                            | 9                 | [1]  |
| <a href="#">T. Ishikawa, et al. <i>J. Phys. Soc. Jpn.</i> (2004)</a>    | SrTi <sup>16</sup> O <sub>3</sub>                                              | -                                                              | 5                 | [2]  |
| <a href="#">F. Pan, et al. <i>Appl. Phys. Lett.</i> (2004)</a>          | La:SrTiO <sub>3</sub>                                                          | 3                                                              | 8                 | [3]  |
| <a href="#">A. Kalabukhov, et al. <i>Phys. Rev. B</i> (2007)</a>        | SrTiO <sub>3</sub> on LaAlO <sub>3</sub>                                       | 10                                                             | 1                 | [4]  |
| <a href="#">H. Nakamura, et al. <i>J. Phys. Soc. Jpn.</i> (2009)</a>    | SrTiO <sub>3</sub>                                                             | -                                                              | 13                | [5]  |
| <a href="#">H. Kim, et al. <i>Phys. Rev. B</i> (2012)</a>               | (Ba,La)SnO <sub>3</sub>                                                        | 300                                                            | 5                 | [6]  |
| <a href="#">I. Chung, et al. <i>J. Am. Chem. Soc.</i> (2012)</a>        | CsSnI <sub>3</sub>                                                             | 585                                                            | 2                 | [7]  |
| <a href="#">H. Kozuka, et al. <i>J. Mater. Chem.</i> (2012)</a>         | La <sub>1-x</sub> Sr <sub>x</sub> CoO <sub>3</sub>                             | 5.8                                                            | 3                 | [8]  |
| <a href="#">Y. Takahashi, et al. <i>J. Solid State Chem.</i> (2013)</a> | CH <sub>3</sub> NH <sub>3</sub> SnI <sub>3</sub>                               | 150                                                            | 1                 | [9]  |
| <a href="#">C. Stoumpos, et al. <i>Inorg. Chem.</i> (2013)</a>          | CH <sub>3</sub> NH <sub>3</sub> SnI <sub>3</sub>                               | 2320                                                           | 3                 | [10] |
| <a href="#">A. Ali, et al. <i>J. Korean Phys. Soc.</i> (2013)</a>       | La <sub>0.01</sub> Ba <sub>0.99</sub> TiO <sub>3</sub>                         | 0.2                                                            | 6                 | [11] |
| <a href="#">W. Lee, et al. <i>Phys. Status Solidi A.</i> (2015)</a>     | Ba <sub>0.96</sub> La <sub>0.04</sub> SnO <sub>3</sub>                         | -                                                              | 13                | [12] |
| <a href="#">D. Luo, et al. <i>RSC Adv.</i> (2015)</a>                   | CH <sub>3</sub> NH <sub>3</sub> PbI <sub>3-x</sub> Cl <sub>x</sub>             | 13.5                                                           | 0                 | [13] |
| <a href="#">M. Vigneshwaran, et al. <i>Chem. Mater.</i> (2016)</a>      | (CH <sub>3</sub> NH <sub>3</sub> ) <sub>3</sub> Bi <sub>2</sub> I <sub>9</sub> | 2.28                                                           | 0                 | [14] |
| <a href="#">B. Li, et al. <i>J. Alloy. Compd.</i> (2016)</a>            | Ba(Nb <sub>x</sub> Sn <sub>1-x</sub> )O <sub>3</sub>                           | 19.65                                                          | 0                 | [15] |
| <a href="#">Y. Chen, et al. <i>Nat. Commun.</i> (2016)</a>              | CH <sub>3</sub> NH <sub>3</sub> PbBr <sub>3</sub>                              | 60                                                             | 16                | [16] |
| <a href="#">J. Shiogai, et al. <i>AIP Adv.</i> (2016)</a>               | La:BaSnO <sub>3</sub>                                                          | 78                                                             | 1                 | [17] |
| <a href="#">B. Saparov, et al. <i>Chem. Mater.</i> (2016)</a>           | Cs <sub>2</sub> SnI <sub>6</sub>                                               | 2.9                                                            | 3                 | [18] |
| <a href="#">F. Guo, et al. <i>Mater. Res. Lett.</i> (2017)</a>          | Cs <sub>2</sub> SnI <sub>6</sub>                                               | 509                                                            | 0                 | [19] |
| <a href="#">H. Zhang, et al. <i>Cryst. Growth Des.</i> (2017)</a>       | CsPbBr <sub>3</sub>                                                            | 143                                                            | 1                 | [20] |
| <a href="#">R. Kikuchi, et al. <i>Chem. Mater.</i> (2017)</a>           | SrNbO <sub>2</sub> N                                                           | 0.1                                                            | 0                 | [21] |

(For Hall checklist form, see the last two pages)

| Paper reporting Hall-effect mobility                                   | Material                                               | $\mu_{\text{Hall}}$<br>$\text{cm}^2\text{V}^{-1}\text{s}^{-1}$ | $r_{\text{Hall}}$ | Ref. |
|------------------------------------------------------------------------|--------------------------------------------------------|----------------------------------------------------------------|-------------------|------|
| <a href="#">Z. Su, et al. <i>J. Mater. Sci-mater. El.</i> (2017)</a>   | $\text{CH}_3\text{NH}_3\text{PbBr}_3$                  | 2630                                                           | 0                 | [22] |
| <a href="#">C. Chung, et al. <i>J. Mater. Chem. A</i> (2017)</a>       | $\text{GO}:\text{CH}_3\text{NH}_3\text{PbI}_3$         | 35.3                                                           | 0                 | [23] |
| <a href="#">B. Li, et al. <i>J. Alloy. Compd.</i> (2017)</a>           | $\text{Ba}_{1-x}\text{Sm}_x\text{SnO}_3$               | 4.266                                                          | 0                 | [24] |
| <a href="#">D. Ju, et al. <i>J. Mater. Chem. A</i> (2018)</a>          | $\text{MA}_3\text{Sb}_2\text{I}_9$                     | 43                                                             | 1                 | [25] |
| <a href="#">H. Yi, et al. <i>Phys. Rev. Appl.</i> (2018)</a>           | $\text{CsPbBr}_3$                                      | 9.5                                                            | 14                | [26] |
| <a href="#">E. McCalla, et al. <i>Phys. Rev. Mater.</i> (2018)</a>     | $\text{Ba}_{1-x}\text{Nd}_x\text{SnO}_{3-6}$           | 174                                                            | 0                 | [27] |
| <a href="#">J. Han, et al. <i>Small</i> (2018)</a>                     | $\text{CH}_3\text{NH}_3\text{PbI}_3\text{-PbS}$        | 1173                                                           | 0                 | [28] |
| <a href="#">J. Zhang, et al. <i>J. Mater. Sci.</i> (2018)</a>          | $\text{B-}\gamma\text{-CsSnI}_3$                       | 18.48                                                          | 0                 | [29] |
| <a href="#">J. Shin, et al. <i>Phys. Rev. Mater.</i> (2018)</a>        | $\text{BaSn}_{1-x}\text{Hf}_x\text{O}_3$               | 95.3                                                           | 0                 | [30] |
| <a href="#">Y. Yang, et al. <i>J. Mater. Sci-mater. El.</i> (2018)</a> | $\text{NaI}:\text{CH}_3\text{NH}_3\text{PbI}_3$        | 63.7                                                           | 0                 | [31] |
| <a href="#">D. Gao, et al. <i>Phys. Status Solidi-r.</i> (2019)</a>    | $\text{BaTi}_{0.75}\text{Nb}_{0.25}\text{O}_3$         | 0.4                                                            | 0                 | [32] |
| <a href="#">O. Gunawan, et al. <i>Nature</i> (2019)</a>                | $(\text{FA,MA})\text{Pb}(\text{I,Br})_3$               | 9.8                                                            | 16                | [33] |
| <a href="#">T. Lien, et al. <i>Mater. Res. Express</i> (2019)</a>      | $\text{Cs}_2\text{SnI}_6$                              | 468.1                                                          | 0                 | [34] |
| <a href="#">Q. Gao, et al. <i>ACS Appl. Mater. Inter.</i> (2019)</a>   | $\text{La}_{0.05}\text{Sr}_{0.95}\text{PbO}_3$         | 39.9                                                           | 0                 | [35] |
| <a href="#">H. Wang, et al. <i>Phys. Rev. Mater.</i> (2019)</a>        | $\text{BaSnO}_3$                                       | 37                                                             | 3                 | [36] |
| <a href="#">D. Shan, et al. <i>Nanoscale Res. Lett.</i> (2019)</a>     | $\text{CH}_3\text{NH}_3\text{PbI}_3$                   | 5                                                              | 0                 | [37] |
| <a href="#">A. Musienko, et al. <i>Energ. Environ. Sci.</i> (2019)</a> | $\text{CH}_3\text{NH}_3\text{PbBr}_3$                  | 87.1                                                           | 15                | [38] |
| <a href="#">K. Miura, et al. <i>Phys. Status Solidi A.</i> (2019)</a>  | $(\text{Ba,L a})\text{SnO}_3$                          | 33                                                             | 2                 | [39] |
| <a href="#">Z. Khan, et al. <i>J. Mater. Sci-mater. El.</i> (2019)</a> | $\text{CH}_3\text{NH}_3\text{PbI}_3$                   | 195                                                            | 0                 | [40] |
| <a href="#">S. Ullah, et al. <i>Semicond. Sci. Tech.</i> (2020)</a>    | $\text{Cs}_2\text{SnI}_6$                              | 425                                                            | 0                 | [41] |
| <a href="#">A. Dayan, et al. <i>Mater. Adv.</i> (2020)</a>             | $\text{CsSnI}_3$                                       | 9                                                              | 0                 | [42] |
| <a href="#">K. Li, et al. <i>Opt. Mater.</i> (2020)</a>                | $(\text{Sm}_x\text{Sr}_{1-x})\text{SnO}_3$             | 14.8                                                           | 0                 | [43] |
| <a href="#">A. Kirmani, et al. <i>Plos One</i> (2020)</a>              | $\text{CH}_3\text{NH}_3\text{PbBr}_3$                  | 319.98                                                         | 2                 | [44] |
| <a href="#">F. Li, et al. <i>J. Mater. Chem. A</i> (2020)</a>          | $\text{Rb}_3\text{Sb}_2\text{I}_9$                     | 0.26                                                           | 5                 | [45] |
| <a href="#">L. Jin, et al. <i>J. Mater. Sci-mater. El.</i> (2020)</a>  | $\text{CH}_3\text{NH}_3\text{PbI}_3$                   | 90                                                             | 2                 | [46] |
| <a href="#">X. Wei, et al. <i>Nano Energy</i> (2020)</a>               | $\text{BaZrS}_3$                                       | 13.7                                                           | 12                | [47] |
| <a href="#">Y. Wang, et al. <i>Nat. Nanotechnol.</i> (2020)</a>        | $\text{CsPbBr}_3$                                      | 118                                                            | 13                | [48] |
| <a href="#">H. Shaili, et al. <i>RSC Adv.</i> (2021)</a>               | $\text{Pr}:\text{SrSnO}_3$                             | 7.6                                                            | 0                 | [49] |
| <a href="#">A. Musienko, et al. <i>Adv. Funct. Mater.</i> (2021)</a>   | $\text{CH}_3\text{NH}_3\text{PbI}_3$                   | 12                                                             | 14                | [50] |
| <a href="#">A. Karim, et al. <i>Sci. Rep.</i> (2021)</a>               | $\text{CH}_3\text{NH}_3\text{PbI}_{3-x}\text{Cl}_x$    | 49                                                             | 1                 | [51] |
| <a href="#">J. Wang, et al. <i>J. Phys. D. Appl. Phys.</i> (2021)</a>  | $\text{Cs}_2\text{SnI}_6$                              | 391                                                            | 0                 | [52] |
| <a href="#">Y. Tomioka, et al. <i>J. Phys. Soc. Jpn.</i> (2021)</a>    | $\text{LaNiO}_3$                                       | -                                                              | 3                 | [53] |
| <a href="#">Q. Li, et al. <i>Chinese Phys. B</i> (2021)</a>            | $\text{Sr}:\text{Ba}_{0.7}\text{La}_{0.3}\text{TiO}_3$ | 0.36                                                           | 0                 | [54] |
| <a href="#">H. Shaili, et al. <i>J. Alloy. Compd.</i> (2021)</a>       | $\text{CaSnS}_3$                                       | 131                                                            | 0                 | [55] |
| <a href="#">V. Bruevich, et al. <i>Adv. Mater.</i> (2022)</a>          | $\text{CsPbBr}_3$                                      | 30                                                             | 16                | [56] |
| <a href="#">T. Liu, et al. <i>Appl. Phys. Lett.</i> (2022)</a>         | $\text{MAPb}_{1-x}\text{Cu}_x\text{I}_3$               | 90.1                                                           | 2                 | [57] |
| <a href="#">J. Zhang, et al. <i>Nanomater.</i> (2022)</a>              | $\text{Li}:\text{Cs}_2\text{SnI}_6$                    | 356.6                                                          | 0                 | [58] |
| <a href="#">Y. Reo, et al. <i>Adv. Funct. Mater.</i> (2022)</a>        | $(\text{PEA})_2\text{SnI}_4$                           | 100                                                            | 1                 | [59] |
| <a href="#">A. Chauhan, et al. <i>Microelectron. Eng.</i> (2022)</a>   | $\text{CsPbBr}_2\text{Cl}$                             | 9                                                              | 0                 | [60] |
| <a href="#">R. Ismail, et al. <i>Opt. Mater.</i> (2022)</a>            | $\text{CH}_3\text{NH}_3\text{PbI}_3$                   | 0.26                                                           | 0                 | [61] |
| <a href="#">A. Liu, et al. <i>Nat. Electron.</i> (2022)</a>            | $\text{CsSnI}_3$                                       | 486                                                            | 1                 | [62] |
| <a href="#">K. Belthle, et al. <i>Adv. Funct. Mater.</i> (2022)</a>    | $\text{La}:\text{BaSnO}_3$                             | 70                                                             | 1                 | [63] |
| <a href="#">V. Murgulov, et al. <i>J. Mater. Sci.</i> (2022)</a>       | $\text{Cs}_2\text{AgBiBr}_6$                           | 2.36                                                           | 3                 | [64] |
| <b>Polymers</b>                                                        |                                                        |                                                                |                   |      |
| <a href="#">S. Chen, et al. <i>J. Phys. Chem. B</i> (2005)</a>         | PPEEB                                                  | 0.5                                                            | 2                 | [65] |
| <a href="#">G. Lee, et al. <i>Curr. Appl. Phys.</i> (2012)</a>         | P3IT                                                   | -                                                              | 0                 | [66] |

| Paper reporting Hall-effect mobility                                         | Material                                                | $\mu_{\text{Hall}}$<br>$\text{cm}^2\text{V}^{-1}\text{s}^{-1}$ | $r_{\text{Hall}}$ | Ref.  |
|------------------------------------------------------------------------------|---------------------------------------------------------|----------------------------------------------------------------|-------------------|-------|
| <a href="#">S. Wang, et al. <i>Nat. Commun.</i> (2012)</a>                   | P3HT                                                    | -                                                              | 16                | [67]  |
| <a href="#">S. Lee, et al. <i>Adv. Funct. Mater.</i> (2014)</a>              | HBr:PEDOT                                               | 8                                                              | 3                 | [68]  |
| <a href="#">B. Gupta, et al. <i>J. Mater. Chem. C</i> (2015)</a>             | PIM-1                                                   | 4.4E-6                                                         | 5                 | [69]  |
| <a href="#">D. Scholes, et al. <i>J. Phys. Chem. Lett.</i> (2015)</a>        | F <sub>4</sub> TCNQ:P3HT                                | 0.0241                                                         | 5                 | [70]  |
| <a href="#">S. Senanayak, et al. <i>Phys. Rev. B</i> (2015)</a>              | 2DPP-TEG                                                | 1.2                                                            | 14                | [71]  |
| <a href="#">S. Ozaki, et al. <i>Synthetic Met.</i> (2016)</a>                | PEDOT:PSS                                               | 0.49                                                           | 16                | [72]  |
| <a href="#">Y. Yamashita, et al. <i>Chem. Mater.</i> (2016)</a>              | CDT-BTZ-C20                                             | 2.6                                                            | 13                | [73]  |
| <a href="#">D. Scholes, et al. <i>Adv. Funct. Mater.</i> (2017)</a>          | F <sub>4</sub> TCNQ:P3HT                                | 0.12                                                           | 5                 | [74]  |
| <a href="#">S. Kim. <i>B. Kor. Chem. Soc.</i> (2017)</a>                     | PEDOT:PSS/GQD                                           | 0.23                                                           | 0                 | [75]  |
| <a href="#">R. Fujimoto, et al. <i>Org. Electron.</i> (2017)</a>             | PBTTT-C16/F <sub>4</sub> -TCNQ                          | 1.5                                                            | 16                | [76]  |
| <a href="#">S. Rudd, et al. <i>J. Polym. Sci. Pol. Phys.</i> (2018)</a>      | Tos/CIO <sub>4</sub> :PEDOT                             | 3                                                              | 0                 | [77]  |
| <a href="#">T. Aubry, et al. <i>Adv. Mater.</i> (2019)</a>                   | DDB-F <sub>72</sub> :P3HT                               | 0.1                                                            | 5                 | [78]  |
| <a href="#">D. Scholes, et al. <i>Chem. Mater.</i> (2019)</a>                | F <sub>4</sub> TCNQ:P37S                                | 0.17                                                           | 3                 | [79]  |
| <a href="#">Y. Zheng, et al. <i>J. Phys. D. Appl. Phys.</i> (2019)</a>       | PEDOT:PSS                                               | 0.299                                                          | 0                 | [80]  |
| <a href="#">P. Stadler, et al. <i>Org. Electron.</i> (2019)</a>              | PEDOT:TfO                                               | 0.3                                                            | 8                 | [81]  |
| <a href="#">S. Yoon, et al. <i>ACS Appl. Mater. Inter.</i> (2020)</a>        | F <sub>4</sub> TCNQ:PIDF-BT                             | 0.7                                                            | 6                 | [82]  |
| <a href="#">H. Li, et al. <i>Adv. Funct. Mater.</i> (2020)</a>               | FeCl <sub>3</sub> :PDPP-g <sub>3</sub> T <sub>0.3</sub> | 2                                                              | 7                 | [83]  |
| <a href="#">J. Park, et al. <i>Adv. Funct. Mater.</i> (2020)</a>             | F <sub>4</sub> TCNQ:PIDF-BT                             | 0.85                                                           | 7                 | [84]  |
| <a href="#">G. Drewelow, et al. <i>Appl. Surf. Sci.</i> (2020)</a>           | PEDOT                                                   | 5                                                              | 0                 | [85]  |
| <a href="#">A. Almohammed, et al. <i>Mat. Sci. Semicon. Proc.</i> (2020)</a> | PbI <sub>2</sub> :P3HT                                  | 0.223                                                          | 1                 | [86]  |
| <a href="#">I. Paulraj, et al. <i>ACS Appl. Mater. Inter.</i> (2021)</a>     | EG/NaBH <sub>4</sub> :PEDOT:PSS                         | 33.6                                                           | 0                 | [87]  |
| <a href="#">B. Kim, et al. <i>Adv. Funct. Mater.</i> (2021)</a>              | EPG:graphene                                            | 701                                                            | 1                 | [88]  |
| <a href="#">Z. Liang, et al. <i>Nat. Mater.</i> (2021)</a>                   | FeCl <sub>3</sub> :P3HT                                 | 0.3                                                            | 14                | [89]  |
| <a href="#">A. Anbalagan, et al. <i>RSC Adv.</i> (2021)</a>                  | PEDOT:PSS                                               | 0.3                                                            | 0                 | [90]  |
| <a href="#">M. Zhang, et al. <i>J. Water Process. Eng.</i> (2022)</a>        | ZnIn <sub>2</sub> S <sub>4</sub> :PEDOT                 | 173.15                                                         | 0                 | [91]  |
| <a href="#">X. Wang, et al. <i>Adv. Mater.</i> (2023)</a>                    | FBDPPV-OEG                                              | 0.14                                                           | 6                 | [92]  |
| <b>Organic Crystals</b>                                                      |                                                         |                                                                |                   |       |
| <a href="#">V. Podzorov, et al. <i>Phys. Rev. Lett.</i> (2005)</a>           | rubrene                                                 | 10                                                             | 14                | [93]  |
| <a href="#">J. Takeya, et al. <i>Jpn. J. Appl. Phys.</i> (2005)</a>          | rubrene                                                 | 1.5                                                            | 13                | [94]  |
| <a href="#">J. Takeya, et al. <i>Phys. Rev. Lett.</i> (2007)</a>             | rubrene                                                 | 7.5                                                            | 13                | [95]  |
| <a href="#">N. Minder, et al. <i>Adv. Mater.</i> (2012)</a>                  | PDIF-CN <sub>2</sub>                                    | 6                                                              | 13                | [96]  |
| <a href="#">T. Uemura, et al. <i>Curr. Appl. Phys.</i> (2012)</a>            | C <sub>10</sub> -DNNT                                   | 11                                                             | 8                 | [97]  |
| <a href="#">T. Uemura, et al. <i>Phys. Rev. B</i> (2012)</a>                 | pentacene                                               | 0.6                                                            | 13                | [98]  |
| <a href="#">B. Lee, et al. <i>Nat. Mater.</i> (2013)</a>                     | rubrene                                                 | 6.5                                                            | 14                | [99]  |
| <a href="#">W. Xie, et al. <i>Phys. Rev. Lett.</i> (2014)</a>                | rubrene                                                 | 4                                                              | 13                | [100] |
| <a href="#">J. Takeya, et al. <i>Thin Solid Films</i> (2014)</a>             | DNNT                                                    | 2.1                                                            | 11                | [101] |
| <a href="#">H. Yi, et al. <i>Sci. Rep.</i> (2016)</a>                        | rubrene                                                 | 6                                                              | 10                | [102] |
| <a href="#">C. Ohashi, et al. <i>Adv. Mater.</i> (2017)</a>                  | FeCl <sub>3</sub> :rubrene                              | 4.6                                                            | 12                | [103] |
| <a href="#">X. Ren, et al. <i>Adv. Electron. Mater.</i> (2017)</a>           | rubrene                                                 | 14.6                                                           | 10                | [104] |
| <a href="#">H. Choi, et al. <i>Adv. Funct. Mater.</i> (2018)</a>             | rubrene                                                 | 4.25                                                           | 16                | [105] |
| <a href="#">M. Kikuchi, et al. <i>Appl. Phys. Lett.</i> (2019)</a>           | MoO <sub>3</sub> :rubrene                               | 0.8                                                            | 10                | [106] |
| <a href="#">H. Choi, et al. <i>Adv. Sci.</i> (2020)</a>                      | rubrene                                                 | 7                                                              | 16                | [107] |
| <a href="#">S. Kumagai, et al. <i>Adv. Mater.</i> (2020)</a>                 | PhC <sub>2</sub> -BQQDI                                 | 4                                                              | 13                | [108] |

| Paper reporting Hall-effect mobility                                 | Material | $\mu_{\text{Hall}}$<br>$\text{cm}^2\text{V}^{-1}\text{s}^{-1}$ | $r_{\text{Hall}}$ | Ref.  |
|----------------------------------------------------------------------|----------|----------------------------------------------------------------|-------------------|-------|
| <a href="#">H. Choi, et al. <i>Adv. Funct. Mater.</i> (2020)</a>     | rubrene  | 5.1                                                            | 16                | [109] |
| <a href="#">V. Bruevich, et al. <i>Adv. Funct. Mater.</i> (2021)</a> | rubrene  | 16                                                             | 13                | [110] |

The Hall reliability score,  $r_{\text{Hall}}$ , has been calculated using the checklist given below (with the number of points assigned for each item indicated).<sup>†</sup>

## 1. Varying the magnetic field and longitudinal excitation current.

**1.1. Varying or reversing the magnetic field (2 points).** Raw Hall data (i.e., the Hall voltage,  $V_{\text{Hall}}$ , or the Hall resistance,  $R_{\text{Hall}}$ ) or the extracted Hall parameters (i.e., the Hall mobility,  $\mu_{\text{Hall}}$ , or the Hall carrier concentration,  $n_{\text{Hall}}$ ) recorded when the magnetic field,  $B$ , is changed should be shown. At least two measurements at different non-zero magnetic fields must be taken and reported, with  $\mu_{\text{Hall}}$  calculated using the slope  $\Delta V_{\text{Hall}}/\Delta B$ , rather than an absolute value of as-measured  $V_{\text{Hall}}$  at a single value of  $B$ . In this measurement, the field's magnitude  $|B|$  should be varied by at least a factor of two. Alternatively, the field can be zeroed or flipped (its direction changed to the opposite). In the *a.c.*-Hall methodology using an *a.c.*- $B$  field and a lock-in detection of  $V_{\text{Hall}}$ , the magnetic field's variation (reversal) is automatically implemented. If only a description of  $\mu_{\text{Hall}}$  calculation via the magnetic field reversal, sweeping, or zeroing is given, without showing the corresponding data, 1 point is assigned.

**1.2. Varying or reversing the longitudinal excitation current (2 points).** Raw Hall data ( $V_{\text{Hall}}$  or  $R_{\text{Hall}}$ ) or the extracted  $\mu_{\text{Hall}}$  or  $n_{\text{Hall}}$ , recorded when the longitudinal excitation current,  $I$ , or the corresponding voltage,  $V$ , are changed (both in terms of their magnitude and polarity) should be shown. At least two measurements at different excitation currents must be taken, with  $\mu_{\text{Hall}}$  calculated from the slope  $\Delta V_{\text{Hall}}/\Delta I$ , rather than an absolute value of as-measured  $V_{\text{Hall}}$  at a single value of  $I$ . In such a measurement, the current's magnitude  $|I|$  should be varied by at least a factor of two. Alternatively, the current can be zeroed, or its polarity switched. In the technique of *a.c.*-current excitation with a lock-in detection of the corresponding voltage, varying (reversing) the current is automatically implemented. If only a description of  $\mu_{\text{Hall}}$  calculation via the

excitation current reversal, sweeping, or zeroing is given, without showing the corresponding data, 1 point is assigned.

## **2. Linearity of the Hall voltage with the magnetic field and excitation current.**

**2.1. Linearity of  $V_{\text{Hall}}(I)$  dependence (1 point).** The dependence of the Hall observables ( $V_{\text{Hall}}$  or  $R_{\text{Hall}}$ ) or the extracted Hall parameters ( $\mu_{\text{Hall}}$  or  $n_{\text{Hall}}$ ) on the longitudinal excitation current (i.e.,  $V_{\text{Hall}}(I)$ ,  $\mu_{\text{Hall}}(I)$ , etc.) should be measured and reported. The current should cover a sufficiently wide range, with its magnitude  $|I|$  varied by at least a factor of two. The measurement should demonstrate a linearity of  $V_{\text{Hall}}(I)$  dependence or show that the extracted  $\mu_{\text{Hall}}$  and  $n_{\text{Hall}}$  are independent of  $I$ . This can also be addressed in the *a.c.*-Hall techniques, including that using an *a.c.*-current excitation with a lock-in detection of the corresponding voltage.

**2.2. Linearity of  $V_{\text{Hall}}(B)$  dependence (1 point).** The dependence of the Hall observables ( $V_{\text{Hall}}$  or  $R_{\text{Hall}}$ ) or the extracted Hall parameters ( $\mu_{\text{Hall}}$  or  $n_{\text{Hall}}$ ) on the external magnetic field (i.e.,  $V_{\text{Hall}}(B)$ ,  $\mu_{\text{Hall}}(B)$ , etc.) should be measured and reported. The field should cover a sufficiently wide range, with its magnitude  $|B|$  varied by at least a factor of two. The measurement should demonstrate a linearity of  $V_{\text{Hall}}(B)$  dependence or show that the extracted  $\mu_{\text{Hall}}$  and  $n_{\text{Hall}}$  are independent of  $B$ . Alternatively, an *a.c.*-Hall method with an oscillating  $B$ -field and a lock-in detection of the corresponding Hall voltage can be employed to address this item.

**3. Four-probe conductivity measurements (2 points).** To determine the Hall mobility  $\mu_{\text{Hall}}$  of the sample correctly, one must use of a contact-corrected conductivity  $\sigma$ . The four-probe techniques of  $\sigma$  measurements based on either the traditional Hall-bar geometry with a rectangular channel or a Van der Pauw (VDP) geometry could be used. However, the VDP technique is particularly prone to artifacts and inaccuracies. Thus, it is important to make sure that the following requirements/assumptions are met/valid while using it: (a) all four contacts in VDP geometry must be very small compared to the size of the sample, or the sample should be patterned in such a way that a finite size of the contacts would not affect the measurement (e.g., using a “clover-shaped” pattern); (b) the sample should be homogeneous, and (c) isotropic (in-plane); (d) any parasitic voltage drops or offsets associated with, for instance, contact resistance,

instrumental offsets, a thermoelectric effect, ionic migration, etc., must be small in comparison with the voltage drop between each pair of the voltage probes due to the sample's resistance.

Properly using a four-probe technique for measurements of  $\sigma$  in Hall effect studies, with a detailed description and addressing the above concerns, is important (**2 points**). If not using a four-probe technique to extract  $\sigma$ , contact resistance must be shown to be much smaller than the channel resistance by other experimental techniques (e.g., transmission line method) (**1 point**). Essentially, it is necessary to experimentally show that the longitudinal voltage drop along the conduction channel of the sample/device is much greater than the voltage drop across the contacts in the entire excitation voltage or current ranges of the Hall measurements. If this is shown, a two-probe  $\sigma$  can be used in the calculation of  $\mu_{\text{Hall}}$ .

**4. Switching between contacts in Van der Pauw configuration (2 points).** If a VDP technique is used, it must be shown that the artifacts listed in the previous section are eliminated. This can be done by testing all possible combinations of contact pairs, with the excitation current in both polarities for each combination: in total, 8 individual measurements of  $\sigma$  and 4 individual measurements of  $V_{\text{Hall}}$  (considering that a reversal of the  $B$ -field is performed for each choice of contacts, as described in **sec. 1.1**). The data should be analyzed by calculating the standard deviations and the properly calculated mean values for  $\sigma$  and  $\mu_{\text{Hall}}$ . Importantly, it must be checked that the individual measurements of  $\sigma$  and  $\mu_{\text{Hall}}$  are not self-contradictory. Namely, if the standard deviation is not smaller than the mean value, the measurements should be considered unreliable, which is most likely caused by a strong asymmetry in the physical characteristics of the contacts or inhomogeneities of the sample. In rare cases, significant variability of the measurement results between different contact pairs in VDP measurements can be associated with intrinsic or extrinsic anisotropy of samples, as described in the main text, in which case further control tests are necessary. The results of all individual-contact-pair VDP measurements, their analysis, and the final calculated averaged values should be presented. If only a description of the use of a proper contact geometry and method, including switching between contact pairs, is given, without showing the raw data, **1 point** is assigned.

**5. Long-term evolution and hysteresis of the Hall signal (1 point).** Showing data on the time evolution of the Hall signal ( $V_{\text{Hall}}$  or  $R_{\text{Hall}}$ ) or the extracted Hall parameters ( $\mu_{\text{Hall}}$  or  $n_{\text{Hall}}$ ) is important. A procedure for subtracting a possible drifting or fluctuating background must be explained. Alternatively, hysteresis in the measured dependences of  $\mu_{\text{Hall}}$  on the  $B$ -field, excitation current  $I$ , temperature  $T$ , or gate voltage  $V_G$ , should be characterized and shown to be insignificant. For example, demonstrating a good long-term stability of  $\mu_{\text{Hall}}$  (with the background properly subtracted) or a negligible hysteresis in  $\mu_{\text{Hall}}(B, I, T, V_G)$  dependences is sufficient. This section is relevant to both *d.c.*- and *a.c.*-Hall measurements.

**6. Apparent frequency dependence in *a.c.*-Hall measurements (1 point).** In *a.c.*-Hall measurements, the dependence of the Hall signal ( $V_{\text{Hall}}$  or  $R_{\text{Hall}}$ ) or the extracted Hall quantities ( $\mu_{\text{Hall}}$  or  $n_{\text{Hall}}$ ) on the frequency,  $f$ , of the oscillating  $B$ -field or the longitudinal excitation current  $I$  should be additionally investigated. A zero-frequency offset of the experimental  $\mu_{\text{Hall}}(f)$  dependence (i.e., the asymptotic value  $\mu_{\text{Hall}}(f \rightarrow 0)$ ) should be taken as the true Hall mobility, corrected for the Faraday induction artifact and possible other frequency dependent contributions. For *a.c.*-Hall measurements, this section and the previous **sec. 5** collectively earn a maximum of 1 point.

**7. Including raw Hall data in publications.**

**7.1. Raw Hall data corresponding to the reported  $\mu_{\text{Hall}}$  should be shown (1 point).** These include raw Hall data ( $V_{\text{Hall}}$  or  $R_{\text{Hall}}$ ) plotted as a function of important common experimental parameters (i.e.,  $B$ ,  $I$ , or  $V_G$ ) or as time traces recorded while these parameters are varied. Alternatively, time or frequency (for *a.c.*-Hall measurements) dependence of the extracted Hall quantities ( $\mu_{\text{Hall}}$  or  $n_{\text{Hall}}$ ) could be reported. These data must be sufficiently detailed to allow, in combination with the listed device parameters (**sec. 8**), an independent extraction of  $\mu_{\text{Hall}}$ .

**7.2. In VDP measurements,  $V_{\text{Hall}}$  for both combinations of contacts must be reported (1 point).** When a VDP methodology is used,  $V_{\text{Hall}}(B, I)$  dependences and  $V_{\text{Hall}}(t)$  time traces, or a Table listing the results of individual measurements for both combinations of contacts and both current polarities (4 measurements in total), should be included in publications. At the very least, one



representative set of such raw data must be shown, in addition to a Table listing all the individual results for each combination of contacts, their standard deviation, and the correctly calculated final value.

## **8. Description of studied devices.**

**8.1. Contact geometry and relevant dimensions must be explicitly listed (1 point).** All the relevant in-plane sample dimensions, including the channel's width and length, distances between the voltage probes and their width, as well as the total thickness of the sample (especially important when bulk (3D) conductivity is reported/used), must be listed. Alternatively, a photograph with a scale bar for each key device can be included. This information, in combination with the presented raw Hall data (**sec. 7**), must be sufficient for an independent verification of the reported  $\mu_{\text{Hall}}$ .

**8.2. Device architecture and the origin of mobile charges must be discussed (1 point).** A sufficiently detailed description of devices' architecture, including their cross-sectional structure, with all the layers' thicknesses and other relevant dimensions, must be included. The source of mobile charge carriers must be explained (e.g., a carrier injection via an electric-field effect as in FETs, a chemical doping or self-doping of films or crystals, a charge-transfer doping at interfaces, a photogeneration of carriers as in photo-Hall effect measurements). This information, together with the information on the in-plane device layout (**sec. 8.1**) and the raw Hall data (**sec. 7**), must be sufficient for an independent verification of the reported  $\mu_{\text{Hall}}$ . For example, when FETs are used to induce conductivity, the corresponding device parameters, including the type of the gate insulator, its thickness, dielectric constant, and the gate-channel capacitance, must be listed.

**8.3. Device photos and sketches should be included (1 point).** Sufficiently high-resolution (micro)photographs of key devices must be shown. All elements of the device should be clearly visible. Alternatively, a detailed sketch of the sample, showing the contact layout and channel geometry, can be included.

<sup>†</sup> Points for each item of the checklist were assigned only if the results of the corresponding measurement/test/procedure were not self-contradictory or contradicting the other items of the checklist or the overall conclusion of a paper. For instance, if contact switching in VDP geometry (**sec. 4**) has been performed, but individual measurements using different contact pairs led to inconsistent results (e.g., drastically different  $\mu_{\text{Hall}}$  values), and this issue has not been addressed by the authors, zero points would be assigned for this item.

## References:

- [1] E. Bellingeri, L. Pellegrino, D. Marre, I. Pallecchi, A. Siri, "All-SrTiO<sub>3</sub> field effect devices made by anodic oxidation of epitaxial semiconducting thin films", *J. Appl. Phys.* **94**, 5976-5981 (2003).
- [2] T. Ishikawa, M. Kurita, H. Shimoda, Y. Sakano, S. Koshihara, M. Itoh, M. Takesada, "Isotope effect on photoconductivity in quantum paraelectric SrTiO<sub>3</sub>", *J. Phys. Soc. Jpn.* **73**, 1635-1638 (2004).
- [3] F. Pan, D. Olaya, J. Price, C. Rogers, "Thin-film field-effect transistors based on La-doped SrTiO<sub>3</sub> heterostructures", *Appl. Phys. Lett.* **84**, 1573-1575 (2004).
- [4] A. Kalabukhov, R. Gunnarsson, J. Borjesson, E. Olsson, T. Claeson, D. Winkler, "Effect of oxygen vacancies in the SrTiO<sub>3</sub> substrate on the electrical properties of the LaAlO<sub>3</sub>/SrTiO<sub>3</sub> interface", *Phys. Rev. B* **75**, 121404 (2007).
- [5] H. Nakamura, H. Tomita, H. Akimoto, R. Matsumura, I. Inoue, T. Hasegawa, K. Kono, Y. Tokura, H. Takagi, "Tuning of Metal-Insulator Transition of Quasi-Two-Dimensional Electrons at Parylene/SrTiO<sub>3</sub> Interface by Electric Field", *J. Phys. Soc. Jpn.* **78**, 83713 (2009).
- [6] H. J. Kim, U. Kim, T. H. Kim, J. Kim, H. M. Kim, B. G. Jeon, W. J. Lee, H. S. Mun, K. T. Hong, J. Yu, K. Char, K. H. Kim, "Physical properties of transparent perovskite oxides (Ba,La)SnO<sub>3</sub> with high electrical mobility at room temperature", *Phys. Rev. B* **86**, 165205 (2012).
- [7] I. Chung, J. Song, J. Im, J. Androulakis, C. Malliakas, H. Li, A. Freeman, J. Kenney, M. Kanatzidis, "CsSnI<sub>3</sub>: Semiconductor or Metal? High Electrical Conductivity and Strong Near-Infrared Photoluminescence from a Single Material. High Hole Mobility and Phase-Transitions", *J. Am. Chem. Soc.* **134**, 8579-8587 (2012).
- [8] H. Kozuka, H. Yamada, T. Hishida, K. Yamagiwa, K. Ohbayashi, K. Koumoto, "Electronic transport properties of the perovskite-type oxides La<sub>1-x</sub>Sr<sub>x</sub>CoO<sub>3</sub> +/-delta", *J. Mater. Chem.* **22**, 20217-20222 (2012).
- [9] Y. Takahashi, H. Hasegawa, Y. Takahashi, T. Inabe, "Hall mobility in tin iodide perovskite CH<sub>3</sub>NH<sub>3</sub>SnI<sub>3</sub>: Evidence for a doped semiconductor", *J. Solid State Chem.* **205**, 39-43 (2013).
- [10] C. Stoumpos, C. Malliakas, M. Kanatzidis, "Semiconducting Tin and Lead Iodide Perovskites with Organic Cations: Phase Transitions, High Mobilities, and Near-Infrared Photoluminescent Properties", *Inorg. Chem.* **52**, 9019-9038 (2013).
- [11] A. Ali, A. Moez, Y. Kim, "Hall mobility, electrical resistivity, and dielectric properties of reduced La<sub>0.01</sub>Ba<sub>0.99</sub>TiO<sub>3</sub>", *J. Korean Phys. Soc.* **62**, 1024-1030 (2013).

- [12] W. Lee, H. Kim, E. Sohn, H. Kim, T. Kim, K. Char, J. Kim, K. Kim, "Oxygen diffusion process in a Ba<sub>0.96</sub>La<sub>0.04</sub>SnO<sub>3</sub> thin film on SrTiO<sub>3</sub>(001) substrate as investigated by time-dependent Hall effect measurements", *Phys. Status Solidi A*. **212**, 1487-1493 (2015).
- [13] D. Luo, L. Yu, H. Wang, T. Zou, L. Luo, Z. Liu, Z. Lu, "Cubic structure of the mixed halide perovskite CH<sub>3</sub>NH<sub>3</sub>PbI<sub>3</sub>-xCl<sub>x</sub> via thermal annealing", *RSC Adv.* **5**, 85480-85485 (2015).
- [14] M. Vigneshwaran, T. Ohta, S. Iikubo, G. Kapil, T. Ripolles, Y. Ogomi, T. Ma, S. Pandey, Q. Shen, T. Toyoda, K. Yoshino, T. Minemoto, S. Hayase, "Facile Synthesis and Characterization of Sulfur Doped Low Bandgap Bismuth Based Perovskites by Soluble Precursor Route", *Chem. Mater.* **28**, 6436-6440 (2016).
- [15] B. Li, Q. Liu, Y. Zhang, Z. Liu, L. Geng, "Highly conductive Nb doped BaSnO<sub>3</sub> thin films on MgO substrates by pulsed laser deposition", *J. Alloy. Compd.* **680**, 343-349 (2016).
- [16] Y. Chen, H. Yi, X. Wu, R. Haroldson, Y. Gartstein, Y. Rodionov, K. Tikhonov, A. Zakhidov, X. Zhu, V. Podzorov, "Extended carrier lifetimes and diffusion in hybrid perovskites revealed by Hall effect and photoconductivity measurements", *Nat. Commun.* **7**, 12253 (2016).
- [17] J. Shiogai, K. Nishihara, K. Sato, A. Tsukazaki, "Improvement of electron mobility in La: BaSnO<sub>3</sub> thin films by insertion of an atomically flat insulating (Sr,Ba)SnO<sub>3</sub> buffer layer", *AIP Adv.* **6**, 65305 (2016).
- [18] B. Saparov, J. Sun, W. Meng, Z. Xiao, H. Duan, O. Gunawan, D. Shin, I. Hill, Y. Yan, D. Mitzi, "Thin-Film Deposition and Characterization of a Sn-Deficient Perovskite Derivative Cs<sub>2</sub>SnI<sub>6</sub>", *Chem. Mater.* **28**, 2315-2322 (2016).
- [19] F. W. Guo, Z. H. Lu, D. Mohanty, T. M. Wang, I. B. Bhat, S. B. Zhang, S. F. Shi, M. A. Washington, G. C. Wang, T. M. Lu, "A two-step dry process for Cs<sub>2</sub>SnI<sub>6</sub> perovskite thin film", *Materials Research Letters* **5**, 540-546 (2017).
- [20] H. Zhang, X. Liu, J. Dong, H. Yu, C. Zhou, B. Zhang, Y. Xu, W. Jie, "Centimeter-Sized Inorganic Lead Halide Perovskite CsPbBr<sub>3</sub> Crystals Grown by an Improved Solution Method", *Cryst. Growth Des.* **17**, 6426-6431 (2017).
- [21] R. Kikuchi, T. Nakamura, S. Tamura, Y. Kaneko, K. Hato, "Fundamental Semiconducting Properties of Perovskite Oxynitride SrNbO<sub>2</sub>N: Epitaxial Growth and Characterization", *Chem. Mater.* **29**, 7697-7703 (2017).
- [22] Z. Su, Y. Chen, X. Li, S. Wang, Y. Xiao, "The modulation of opto-electronic properties of CH<sub>3</sub>NH<sub>3</sub>PbBr<sub>3</sub> crystal", *J. Mater. Sci-mater. El.* **28**, 11053-11058 (2017).
- [23] C. Chung, S. Narra, E. Jokar, H. Wu, E. Diau, "Inverted planar solar cells based on perovskite/graphene oxide hybrid composites", *J. Mater. Chem. A* **5**, 13957-13965 (2017).
- [24] B. Li, Y. Zhang, Z. Liu, L. Geng, "Structural, electrical, and optical properties of Ba<sub>1-x</sub>SmxSnO<sub>3</sub> epitaxial thin films on MgO substrates by pulsed laser deposition", *J. Alloy. Compd.* **708**, 1117-1123 (2017).
- [25] D. Ju, X. Jiang, H. Xiao, X. Chen, X. Hu, X. Tao, "Narrow band gap and high mobility of lead-free perovskite single crystal Sn-doped MA(3)Sb(2)I(9)", *J. Mater. Chem. A* **6**, 20753-20759 (2018).
- [26] H. Yi, P. Irkhin, P. Joshi, Y. Gartstein, X. Zhu, V. Podzorov, "Experimental Demonstration of Correlated Flux Scaling in Photoconductivity and Photoluminescence of Lead-Halide Perovskites", *Phys. Rev. Appl.* **10**, 54016 (2018).

- [27] E. McCalla, D. Phelan, M. Krogstad, B. Dabrowski, C. Leighton, "Electrical transport, magnetic, and thermodynamic properties of La-, Pr-, and Nd-doped BaSnO<sub>3</sub>-delta single crystals", *Phys. Rev. Mater.* **2**, 84601 (2018).
- [28] J. Han, S. Luo, X. Yin, Y. Zhou, H. Nan, J. Li, X. Li, D. Oron, H. Shen, H. Lin, "Hybrid PbS Quantum-Dot-in-Perovskite for High-Efficiency Perovskite Solar Cell", *Small* **14**, 1801016 (2018).
- [29] J. Zhang, S. Li, P. Yang, W. Liu, Y. Liao, "Enhanced stability of lead-free perovskite heterojunction for photovoltaic applications", *J. Mater. Sci.* **53**, 4378-4386 (2018).
- [30] J. Shin, J. Lim, T. Ha, Y. Kim, C. Park, J. Yu, J. Kim, K. Char, "Band gap and mobility of epitaxial perovskite BaSn<sub>1-x</sub>Hf<sub>x</sub>O<sub>3</sub> thin films", *Phys. Rev. Mater.* **2**, 21601 (2018).
- [31] Y. Yang, X. Zou, Y. Pei, X. Bai, W. Jin, D. Chen, "Effect of doping of NaI monovalent cation halide on the structural, morphological, optical and optoelectronic properties of MAPbI<sub>3</sub> perovskite", *J. Mater. Sci-mater. El.* **29**, 205-210 (2018).
- [32] D. Gao, M. Guo, Q. Li, A. Zhang, J. Feng, M. Qin, Z. Fan, D. Chen, M. Zeng, G. Zhou, X. Lu, J. Liu, "Cationic Vacancy Mediated Conductivity and Charge Transport in Non-Stoichiometric Epitaxial BaTi<sub>(0.75)</sub>Nb<sub>(0.25)</sub>O<sub>3</sub>Films", *Phys. Status Solidi-r.* **13**, 1900418 (2019).
- [33] O. Gunawan, S. Pae, D. Bishop, Y. Virgus, J. Noh, N. Jeon, Y. Lee, X. Shao, T. Todorov, D. Mitzi, B. Shin, "Carrier-resolved photo-Hall effect", *Nature* **575**, 151 (2019).
- [34] T. Lien, N. Dai, N. Thanh, P. Phuc, N. Oanh, P. Long, P. Hoi, L. Chi, "Tin fluoride assisted growth of air stable perovskite derivative Cs<sub>2</sub>SnI<sub>6</sub> thin film as a hole transport layer", *Mater. Res. Express* **6**, 116442 (2019).
- [35] Q. Gao, K. Li, L. Zhao, K. Zhang, H. Li, J. Zhang, Q. Liu, "Wide-Range Band-Gap Tuning and High Electrical Conductivity in La- and Pb-Doped SrSnO<sub>3</sub> Epitaxial Films", *ACS Appl. Mater. Inter.* **11**, 25605-25612 (2019).
- [36] H. Wang, J. Walter, K. Ganguly, B. Yu, G. Yu, Z. Zhang, H. Zhou, H. Fu, M. Greven, C. Leighton, "Wide-voltage-window reversible control of electronic transport in electrolyte-gated epitaxial BaSnO<sub>3</sub>", *Phys. Rev. Mater.* **3**, 75001 (2019).
- [37] D. Shan, G. Tong, Y. Cao, M. Tang, J. Xu, L. Yu, K. Chen, "The Effect of Decomposed PbI<sub>2</sub> on Microscopic Mechanisms of Scattering in CH<sub>3</sub>NH<sub>3</sub>PbI<sub>3</sub> Films", *Nanoscale Res. Lett.* **14**, 208 (2019).
- [38] A. Musiienko, P. Moravec, R. Grill, P. Praus, I. Vasylenko, J. Pekarek, J. Tisdale, K. Ridzonova, E. Belas, L. Landova, B. Hu, E. Lukosi, M. Ahmadi, "Deep levels, charge transport and mixed conductivity in organometallic halide perovskites", *Energ. Environ. Sci.* **12**, 1413-1425 (2019).
- [39] K. Miura, D. Kiriya, T. Yoshimura, A. Ashida, N. Fujimura, "Fabrication and Characterization of (Ba,Lu)SnO<sub>3</sub> Semiconducting Epitaxial Films on (111) and (001) SrTiO<sub>3</sub> Substrates", *Phys. Status Solidi A.* **216**, 1700800 (2019).
- [40] Z. Khan, Z. Hussain, M. Liaqat, S. Fahad, S. Ahmed, "Optimizing reaction kinetics of sequential deposition technique for ambient air and solution processed hybrid perovskite thin films", *J. Mater. Sci-mater. El.* **30**, 4250-4258 (2019).
- [41] S. Ullah, S. Ullah, J. Wang, S. Yang, T. Xia, H. Guo, Y. Chen, "Investigation of air-stable Cs<sub>2</sub>SnI<sub>6</sub> films prepared by the modified two-step process for lead-free perovskite solar cells", *Semicond. Sci. Tech.* **35**, 125027 (2020).

- [42] A. Dayan, X. Zhong, M. Wierzbowska, C. de Oliveira, A. Kahn, L. Etgar, "The properties, photovoltaic performance and stability of visible to near-IR all inorganic perovskites", *Mater. Adv.* **1**, 1920-1929 (2020).
- [43] K. Li, Q. Gao, L. Zhao, Q. Liu, "Transparent and conductive Sm-doped SrSnO<sub>3</sub> epitaxial films", *Opt. Mater.* **107**, 110139 (2020).
- [44] A. Kirmani, A. Mansour, C. Yang, R. Munir, A. El-Zohry, O. Mohammed, A. Amassian, "Facile and noninvasive passivation, doping and chemical tuning of macroscopic hybrid perovskite crystals", *Plos One* **15**, e0230540 (2020).
- [45] F. Li, Y. Wang, K. Xia, R. Hoye, V. Pecunia, "Microstructural and photoconversion efficiency enhancement of compact films of lead-free perovskite derivative Rb<sub>3</sub>Sb<sub>2</sub>I<sub>9</sub>", *J. Mater. Chem. A* **8**, 4396-4406 (2020).
- [46] L. Jin, Y. Qian, Y. Zhang, M. Bowen, S. Ding, "Polaronic transport in CH<sub>3</sub>NH<sub>3</sub>PbI<sub>3</sub> single crystals", *J. Mater. Sci-mater. El.* **31**, 1945-1950 (2020).
- [47] X. Wei, H. Hui, C. Zhao, C. Deng, M. Han, Z. Yu, A. Sheng, P. Roy, A. Chen, J. Lin, D. Watson, Y. Sun, T. Thomay, S. Yang, Q. Jia, S. Zhang, H. Zeng, "Realization of BaZrS<sub>3</sub> chalcogenide perovskite thin films for optoelectronics", *Nano Energy* **68**, 104317 (2020).
- [48] Y. Wang, Z. Wan, Q. Qian, Y. Liu, Z. Kang, Z. Fan, P. Wang, Y. Wang, C. Li, C. Jia, Z. Lin, J. Guo, I. Shakir, M. Goorsky, X. Duan, Y. Zhang, Y. Huang, X. Duan, "Probing photoelectrical transport in lead halide perovskites with van der Waals contacts", *Nat. Nanotechnol.* **15**, 768 (2020).
- [49] H. Shaili, E. Salmani, M. Beraich, M. Taibi, M. Rouchdi, H. Ez-Zahraouy, N. Hassanain, A. Mzard, "Unraveling the microstructural and optoelectronic properties of solution-processed Pr-doped SrSnO<sub>3</sub> perovskite oxide thin films", *RSC Adv.* **11**, 37019-37028 (2021).
- [50] A. Musiienko, D. Ceratti, J. Pipek, M. Brynza, H. Elhadidy, E. Belas, M. Betusiak, G. Delport, P. Praus, "Defects in Hybrid Perovskites: The Secret of Efficient Charge Transport", *Adv. Funct. Mater.* **31**, 2104467 (2021).
- [51] A. Karim, M. Khan, M. Hossain, "Temperature dependency of excitonic effective mass and charge carrier conduction mechanism in CH<sub>3</sub>NH<sub>3</sub>PbI<sub>3</sub>-xCl<sub>x</sub> thin films", *Sci. Rep.* **11**, 10772 (2021).
- [52] J. Wang, S. Ullah, P. Yang, L. Liu, S. Yang, T. Xia, H. Guo, Y. Chen, "A feasible process for lead-free Cs<sub>2</sub>SnI<sub>6</sub> films using vapor-assisted deposition method with Sn and I-2 powders as reactants", *J. Phys. D. Appl. Phys.* **54**, 145101 (2021).
- [53] Y. Tomioka, T. Ito, E. Maruyama, S. Kimura, I. Shindo, "( )Magnetic and Electronic Properties of Single Crystals of Perovskite Nickelate Oxide LaNiO<sub>3</sub> Prepared by the Laser Diode Floating Zone Method", *J. Phys. Soc. Jpn.* **90**, 34704 (2021).
- [54] Q. Li, D. Wang, Y. Zhang, Y. Li, A. Zhang, R. Tao, Z. Fan, M. Zeng, G. Zhou, X. Lu, J. Liu, "Sr-doping effects on conductivity, charge transport, and ferroelectricity of Ba<sub>0.7</sub>La<sub>0.3</sub>TiO<sub>3</sub> epitaxial thin films\*", *Chinese Phys. B* **30**, 27701 (2021).
- [55] H. Shaili, M. Beraich, A. El Hat, M. Ouafi, E. Salmani, R. Essajai, W. Battal, M. Rouchdi, M. Taibi, N. Hassanain, A. Mzard, "Synthesis of the Sn-based CaSnS<sub>3</sub> chalcogenide perovskite thin film as a highly stable photoabsorber for optoelectronic applications", *J. Alloy. Compd.* **851**, 156790 (2021).
- [56] V. Bruevich, L. Kasaei, S. Rangan, H. Hijazi, Z. Zhang, T. Emge, E. Andrei, R. Bartynski, L. Feldman, V. Podzorov, "Intrinsic (Trap-Free) Transistors Based on Epitaxial Single-Crystal Perovskites", *Adv. Mater.* **34**, 2205055 (2022).

- [57] T. Liu, C. Li, B. Yuan, Y. Chen, H. Wei, B. Cao, "Dopant compensation in p-type doped MAPb(1-x)Cu(x)I(3) alloyed perovskite crystals", *Appl. Phys. Lett.* **121**, 12102 (2022).
- [58] J. Zhang, C. Yang, Y. Liao, S. Li, P. Yang, Y. Xi, W. Liu, D. Golosov, S. Zavadski, S. Melnikov, "Effect of Li<sup>+</sup> Doping on Photoelectric Properties of Double Perovskite Cs<sub>2</sub>SnI<sub>6</sub>: First Principles Calculation and Experimental Investigation", *Nanomater.* **12**, 2279 (2022).
- [59] Y. Reo, H. Zhu, A. Liu, Y. Noh, "Molecular Doping Enabling Mobility Boosting of 2D Sn<sup>2+</sup>-Based Perovskites", *Adv. Funct. Mater.* **32**, 2204870 (2022).
- [60] A. Chauhan, A. Shrivastav, A. Oudhia, "Optical, morphological and electrical studies of fully doctor bladed CsPbBr<sub>2</sub>Cl-based perovskite thin films", *Microelectron. Eng.* **258**, 111757 (2022).
- [61] R. Ismail, R. Abdulnabi, O. Abdulrazzaq, M. Jawad, "Preparation of MAPbI(3) perovskite film by pulsed laser deposition for high-performance silicon-based heterojunction photodetector", *Opt. Mater.* **126**, 112147 (2022).
- [62] A. Liu, H. Zhu, S. Bai, Y. Reo, T. Zou, M. Kim, Y. Noh, "High-performance inorganic metal halide perovskite transistors", *Nat. Electron.* **5**, 78-83 (2022).
- [63] K. Belthle, U. Gries, M. Mueller, D. Kemp, A. Prakash, M. Rose, J. Borgers, B. Jalan, F. Gunkel, R. De Souza, "Quantitative Determination of Native Point-Defect Concentrations at the ppm Level in Un-Doped BaSnO<sub>3</sub> Thin Films", *Adv. Funct. Mater.* **32**, 2113023 (2022).
- [64] V. Murgulov, C. Schweinle, M. Daub, H. Hillebrecht, M. Fiederle, V. Dedic, J. Franc, "Double perovskite Cs<sub>2</sub>AgBiBr<sub>6</sub> radiation sensor: synthesis and characterization of single crystals", *J. Mater. Sci.* **57**, 2758-2774 (2022).
- [65] S. Chen, P. Stradins, B. Gregg, "Doping highly ordered organic semiconductors: Experimental results and fits to a self-consistent model of excitonic processes, doping, and transport", *J. Phys. Chem. B* **109**, 13451-13460 (2005).
- [66] G. Lee, S. Jo, J. Yang, J. Kim, "Hall mobility and characteristics of gas-phase polymerized poly(3-iodothiophene) thin films", *Curr. Appl. Phys.* **12**, 1148-1152 (2012).
- [67] S. Wang, M. Ha, M. Manno, C. Frisbie, C. Leighton, "Hopping transport and the Hall effect near the insulator-metal transition in electrochemically gated poly(3-hexylthiophene) transistors", *Nat. Commun.* **3**, 1210 (2012).
- [68] S. Lee, D. Paine, K. Gleason, "Heavily Doped poly(3,4-ethylenedioxythiophene) Thin Films with High Carrier Mobility Deposited Using Oxidative CVD: Conductivity Stability and Carrier Transport", *Adv. Funct. Mater.* **24**, 7187-7196 (2014).
- [69] B. Gupta, G. Kedawat, P. Kumar, M. Rafiee, P. Tyagi, R. Srivastava, P. Ajayan, "An n-type, new emerging luminescent polybenzodioxane polymer for application in solution-processed green emitting OLEDs", *J. Mater. Chem. C* **3**, 2568-2574 (2015).
- [70] D. Scholes, S. Hawks, P. Yee, H. Wu, J. Lindemuth, S. Tolbert, B. Schwartz, "Overcoming Film Quality Issues for Conjugated Polymers Doped with F(4)TCNQ by Solution Sequential Processing: Hall Effect, Structural, and Optical Measurements", *J. Phys. Chem. Lett.* **6**, 4786-4793 (2015).
- [71] S. Senanayak, A. Ashar, C. Kanimozhi, S. Patil, K. Narayan, "Room-temperature bandlike transport and Hall effect in a high-mobility ambipolar polymer", *Phys. Rev. B* **91**, 115302 (2015).

[72] S. Ozaki, Y. Wada, K. Noda, "DC Hall-effect measurement for inkjet-deposited films of poly(3,4-ethylenedioxythiophene)/poly(4-styrenesulfonate) by using microscale gap electrodes", *Synthetic Met.* **215**, 28-34 (2016).

[73] Y. Yamashita, F. Hinkel, T. Marszalek, W. Zajaczkowski, W. Pisula, M. Baumgarten, H. Matsui, K. Mullen, J. Takeya, "Mobility Exceeding  $10 \text{ cm}^2/(\text{V center dot s})$  in Donor-Acceptor Polymer Transistors with Band-like Charge Transport", *Chem. Mater.* **28**, 420-424 (2016).

[74] D. Scholes, P. Yee, J. Lindemuth, H. Kang, J. Onorato, R. Ghosh, C. Luscombe, F. Spano, S. Tolbert, B. Schwartz, "The Effects of Crystallinity on Charge Transport and the Structure of Sequentially Processed F(4)TCNQ-Doped Conjugated Polymer Films", *Adv. Funct. Mater.* **27**, 1702654 (2017).

[75] S. Kim, "Control of the Charge Carrier Concentration and Hall Mobility in PEDOT:PSS Thermoelectric Films", *B. Kor. Chem. Soc.* **38**, 1460-1464 (2017).

[76] R. Fujimoto, S. Watanabe, Y. Yamashita, J. Tsurumi, H. Matsui, T. Kushida, C. Mitsui, H. Yi, V. Podzorov, J. Takeya, "Control of molecular doping in conjugated polymers by thermal annealing", *Org. Electron.* **47**, 139-146 (2017).

[77] S. Rudd, J. Franco-Gonzalez, S. Singh, Z. Khan, X. Crispin, J. Andreasen, I. Zozoulenko, D. Evans, "Charge transport and structure in semimetallic polymers", *J. Polym. Sci. Pol. Phys.* **56**, 97-104 (2018).

[78] T. Aubry, J. Axtell, V. Basile, K. Winchell, J. Lindemuth, T. Porter, J. Liu, A. Alexandrova, C. Kubiak, S. Tolbert, A. Spokoyny, B. Schwartz, "Dodecaborane-Based Dopants Designed to Shield Anion Electrostatics Lead to Increased Carrier Mobility in a Doped Conjugated Polymer", *Adv. Mater.* **31**, 1805647 (2019).

[79] D. Scholes, P. Yee, G. McKeown, S. Li, H. Kang, J. Lindemuth, X. Xia, S. King, D. Seferos, S. Tolbert, B. Schwartz, "Designing Conjugated Polymers for Molecular Doping: The Roles of Crystallinity, Swelling, and Conductivity in Sequentially-Doped Selenophene-Based Copolymers", *Chem. Mater.* **31**, 73-82 (2019).

[80] Y. Zheng, J. Yu, J. Tang, F. Yang, C. Wang, B. Wei, X. Li, C. Adachi, "Series of polar alcohol-additives assisted improvement in the PEDOT:PSS film property and bulk-heterojunction organic solar cell performance", *J. Phys. D. Appl. Phys.* **52**, 255104 (2019).

[81] P. Stadler, L. Leonat, R. Menon, H. Coskun, S. van Frank, C. Rankl, M. Scharber, "Stable Hall voltages in presence of dynamic quasi-continuum bands in poly (3,4-ethylene-dioxythiophene)", *Org. Electron.* **65**, 412-418 (2019).

[82] S. Yoon, Y. Kang, S. Noh, J. Park, S. Lee, J. Park, D. Lee, D. Whang, T. Kim, G. Kim, H. Seo, B. Kim, J. Kim, "High Efficiency Doping of Conjugated Polymer for Investigation of Intercorrelation of Thermoelectric Effects with Electrical and Morphological Properties", *ACS Appl. Mater. Inter.* **12**, 1151-1158 (2020).

[83] H. Li, J. Song, J. Xiao, L. Wu, H. Katz, L. Chen, "Synergistically Improved Molecular Doping and Carrier Mobility by Copolymerization of Donor-Acceptor and Donor-Donor Building Blocks for Thermoelectric Application", *Adv. Funct. Mater.* **30**, 2004378 (2020).

[84] J. Park, S. Yoon, J. Lee, D. Whang, S. Lee, S. Shin, J. Han, H. Seo, H. Park, J. Kim, B. Kim, "Unraveling Doping Capability of Conjugated Polymers for Strategic Manipulation of Electric Dipole Layer toward Efficient Charge Collection in Perovskite Solar Cells", *Adv. Funct. Mater.* **30**, 2001560 (2020).

- [85] G. Drewelow, H. Song, Z. Jiang, S. Lee, "Factors controlling conductivity of PEDOT deposited using oxidative chemical vapor deposition", *Appl. Surf. Sci.* **501**, 144105 (2020).
- [86] A. Almohammed, M. Khan, M. Benganem, S. Aboud, M. Shkir, S. AlFaify, "Elucidating the impact of PbI<sub>2</sub> on photophysical and electrical properties of poly(3-hexythiophene)", *Mat. Sci. Semicon. Proc.* **120**, 105272 (2020).
- [87] I. Paulraj, T. Liang, T. Yang, C. Wang, J. Chen, Y. Wang, C. Liu, "High Performance of Post-Treated PEDOT:PSS Thin Films for Thermoelectric Power Generation Applications", *ACS Appl. Mater. Inter.* **13**, 42977-42990 (2021).
- [88] B. Kim, C. Cho, M. Han, A. Attias, E. Kim, "Giant Photo-Magneto-Thermoelectric Effect of End-On Oriented PEDOT Grown from Self-Assembled 3D Tectons", *Adv. Funct. Mater.* **31**, 2105297 (2021).
- [89] Z. Liang, H. Choi, X. Luo, T. Liu, A. Abtahi, U. Ramasamy, J. Hitron, K. Baustert, J. Hempel, A. Boehm, A. Ansary, D. Strachan, J. Mei, C. Risko, V. Podzorov, K. Graham, "n-type charge transport in heavily p-doped polymers", *Nat. Mater.* **20**, 518+ (2021).
- [90] A. Anbalagan, S. Gupta, M. Chaudhary, R. Kumar, Y. Chueh, N. Tai, C. Lee, "Consequences of gamma-ray irradiation on structural and electronic properties of PEDOT:PSS polymer in air and vacuum environments", *RSC Adv.* **11**, 20752-20759 (2021).
- [91] M. Zhang, B. Gao, Y. Wang, J. Liu, M. Sillanpaa, "Synergistic degradation of organic pollutants by poly (3,4-ethylenedioxythiophene) based photo-electrocatalysis", *J. Water Process. Eng.* **45**, 102494 (2022).
- [92] X. Wang, Z. Yu, Y. Lu, Z. Yao, Y. Zhou, C. Pan, Y. Liu, Z. Wang, Y. Ding, J. Wang, J. Pei, "Density of States Engineering of n-Doped Conjugated Polymers for High Charge Transport Performances", *Adv. Mater.* **35**, 2300634 (2023).
- [93] V. Podzorov, E. Menard, J. Rogers, M. Gershenson, "Hall effect in the accumulation layers on the surface of organic semiconductors", *Phys. Rev. Lett.* **95**, 226601 (2005).
- [94] J. Takeya, K. Tsukagoshi, Y. Aoyagi, T. Takenobu, Y. Iwasa, "Hall effect of quasi-hole gas in organic single-crystal transistors", *Jpn. J. Appl. Phys.* **44**, L1393-L1396 (2005).
- [95] J. Takeya, J. Kato, K. Hara, M. Yamagishi, R. Hirahara, K. Yamada, Y. Nakazawa, S. Ikehata, K. Tsukagoshi, Y. Aoyagi, T. Takenobu, Y. Iwasa, "In-crystal and surface charge transport of electric-field-induced carriers in organic single-crystal semiconductors", *Phys. Rev. Lett.* **98**, 196804 (2007).
- [96] N. Minder, S. Ono, Z. Chen, A. Facchetti, A. Morpurgo, "Band-Like Electron Transport in Organic Transistors and Implication of the Molecular Structure for Performance Optimization", *Adv. Mater.* **24**, 503 (2012).
- [97] T. Uemura, K. Nakayama, Y. Hirose, J. Soeda, M. Uno, W. Li, M. Yamagishi, Y. Okada, J. Takeya, "Band-like transport in solution-crystallized organic transistors", *Curr. Appl. Phys.* **12**, S87-S91 (2012).
- [98] T. Uemura, M. Yamagishi, J. Soeda, Y. Takatsuki, Y. Okada, Y. Nakazawa, J. Takeya, "Temperature dependence of the Hall effect in pentacene field-effect transistors: Possibility of charge decoherence induced by molecular fluctuations", *Phys. Rev. B* **85**, 35313 (2012).
- [99] B. Lee, Y. Chen, D. Fu, H. Yi, K. Czelen, H. Najafov, V. Podzorov, "Trap healing and ultralow-noise Hall effect at the surface of organic semiconductors", *Nat. Mater.* **12**, 1125-1129 (2013).



[100] W. Xie, S. Wang, X. Zhang, C. Leighton, C. Frisbie, "High Conductance 2D Transport around the Hall Mobility Peak in Electrolyte-Gated Rubrene Crystals", *Phys. Rev. Lett.* **113**, 246602 (2014).

[101] J. Takeya, T. Uemura, K. Sakai, Y. Okada, "Materials and devices with applications in high-end organic transistors", *Thin Solid Films* **554**, 19-26 (2014).

[102] H. Yi, N. Gartstein, V. Podzorov, "Charge carrier coherence and Hall effect in organic semiconductors", *Sci. Rep.* **6**, 23650 (2016).

[103] C. Ohashi, S. Izawa, Y. Shinmura, M. Kikuchi, S. Watase, M. Izaki, H. Naito, M. Hiramoto, "Hall Effect in Bulk-Doped Organic Single Crystals", *Adv. Mater.* **29**, 1605619 (2017).

[104] X. Ren, M. Bruzek, D. Hanifi, A. Schulzetenberg, Y. Wu, C. Kim, Z. Zhang, J. Johns, A. Salleo, S. Fratini, A. Troisi, C. Douglas, C. Frisbie, "Negative Isotope Effect on Field-Effect Hole Transport in Fully Substituted C-13-Rubrene", *Adv. Electron. Mater.* **3**, 1700018 (2017).

[105] H. Choi, Y. Rodionov, A. Paterson, J. Panidi, D. Saranin, N. Kharlamov, S. Didenko, T. Anthopoulos, K. Cho, V. Podzorov, "Accurate Extraction of Charge Carrier Mobility in 4-Probe Field-Effect Transistors", *Adv. Funct. Mater.* **28**, 1707105 (2018).

[106] M. Kikuchi, S. Izawa, N. Rai, M. Hiramoto, "Very low activation energy for carrier generation of surface doped organic single crystals observed by Hall effects", *Appl. Phys. Lett.* **115**, 113301 (2019).

[107] H. Choi, H. Yi, J. Tsurumi, J. Kim, A. Briseno, S. Watanabe, J. Takeya, K. Cho, V. Podzorov, "A Large Anisotropic Enhancement of the Charge Carrier Mobility of Flexible Organic Transistors with Strain: A Hall Effect and Raman Study", *Adv. Sci.* **7**, 1901824 (2020).

[108] S. Kumagai, S. Watanabe, H. Ishii, N. Isahaya, A. Yamamura, T. Wakimoto, H. Sato, A. Yamano, T. Okamoto, J. Takeya, "Coherent Electron Transport in Air-Stable, Printed Single-Crystal Organic Semiconductor and Application to Megahertz Transistors", *Adv. Mater.* **32**, 2003245 (2020).

[109] H. Choi, A. Paterson, M. Fusella, J. Panidi, O. Solomeshch, N. Tessler, M. Heeney, K. Cho, T. Anthopoulos, B. Rand, V. Podzorov, "Hall Effect in Polycrystalline Organic Semiconductors: The Effect of Grain Boundaries", *Adv. Funct. Mater.* **30**, 1903617 (2020).

[110] V. Bruevich, H. Choi, V. Podzorov, "The Photo-Hall Effect in High-Mobility Organic Semiconductors", *Adv. Funct. Mater.* **31**, 2006178 (2021).

## Form: checklist for Hall mobility reporting

This form is recommended for use by authors or reviewers of experimental manuscripts reporting Hall mobility ( $\mu_{\text{Hall}}$ ) measurements in semiconducting materials. It is based on the *Hall checklist* described in detail in Bruevich, V. & Podzorov, V. Reporting Hall effect measurements of charge carrier mobility in emerging materials, *Nat. Electron.* (2024). Completing this form should help authors to improve the thoroughness and reliability of their Hall effect measurements. Likewise, reviewers can use this form to evaluate completeness, reliability, and potential reproducibility of  $\mu_{\text{Hall}}$  measurements reported in manuscripts. Adhering to the checklist and completing this form are especially recommended when novel (underexplored) materials or materials and devices with relatively low charge carrier mobilities are investigated.

### Are the following details of Hall measurements included in the manuscript?

#### 1. Varying (reversing) the magnetic field and longitudinal excitation current.

- |                                                                     |                              |                                                        |
|---------------------------------------------------------------------|------------------------------|--------------------------------------------------------|
| Magnetic field ( $B$ ) variation/reversal                           | <input type="checkbox"/> Yes | <i>State where this can be found in the manuscript</i> |
| $\mu_{\text{Hall}}$ extraction takes into account zero field offset | <input type="checkbox"/> No  | <i>Explain why this is not reported</i>                |
| Current variation/reversal                                          | <input type="checkbox"/> Yes | <i>State where this can be found in the manuscript</i> |
| $\mu_{\text{Hall}}$ extraction takes into account current offset    | <input type="checkbox"/> No  | <i>Explain why this is not reported</i>                |

#### 2. The linearity of the Hall voltage with the magnetic field and excitation current.

- |                                                                                     |                                    |                                                                                |
|-------------------------------------------------------------------------------------|------------------------------------|--------------------------------------------------------------------------------|
| $V_{\text{Hall}}(B)$ or $R_{\text{Hall}}(B)$ dependences                            | <input type="checkbox"/> Yes       | <i>State where this can be found in the manuscript</i>                         |
| For extraction of $\mu_{\text{Hall}}$ , these dependences should be linear with $B$ | <input type="checkbox"/> No        | <i>Explain why this is not reported</i>                                        |
|                                                                                     | <input type="checkbox"/> Elsewhere | <i>Include a reference to your prior paper for the same system/material(s)</i> |
| $V_{\text{Hall}}(I)$ or $R_{\text{Hall}}(I)$ dependence                             | <input type="checkbox"/> Yes       | <i>State where this can be found in the manuscript</i>                         |
| For extraction of $\mu_{\text{Hall}}$ , these dependences should be linear with $I$ | <input type="checkbox"/> No        | <i>Explain why this is not reported</i>                                        |
|                                                                                     | <input type="checkbox"/> Elsewhere | <i>Include a reference to your prior paper for the same system/material(s)</i> |

#### 3. Addressing contact artifacts via proper use of four-probe conductivity measurements.

- |                                                                                                                       |                                    |                                                                                |
|-----------------------------------------------------------------------------------------------------------------------|------------------------------------|--------------------------------------------------------------------------------|
| All reported Hall-effect and conductivity data were obtained using a four-probe technique                             | <input type="checkbox"/> Yes       | <i>State where this is described in the manuscript</i>                         |
|                                                                                                                       | <input type="checkbox"/> No        | <i>Explain why this was not the case</i>                                       |
| Contact resistance is shown to be negligible                                                                          | <input type="checkbox"/> Yes       | <i>State where this is described in the manuscript</i>                         |
| If four-probe technique was not used in extracting $\mu_{\text{Hall}}$ , verify that contact resistance is negligible | <input type="checkbox"/> No        | <i>Explain why this was not done</i>                                           |
|                                                                                                                       | <input type="checkbox"/> Elsewhere | <i>Include a reference to your prior paper for the same system/material(s)</i> |

#### 4. Switching between contacts in Van der Pauw (VDP) configuration (only for VDP measurements).

- |                                                                                            |                              |                                                        |
|--------------------------------------------------------------------------------------------|------------------------------|--------------------------------------------------------|
| $\sigma$ was measured using all VDP contact configurations and current polarities          | <input type="checkbox"/> Yes | <i>State where this can be found in the manuscript</i> |
|                                                                                            | <input type="checkbox"/> No  | <i>Explain why this was not done</i>                   |
| $V_{\text{Hall}}$ was measured using all VDP contact configurations and current polarities | <input type="checkbox"/> Yes | <i>State where this can be found in the manuscript</i> |
|                                                                                            | <input type="checkbox"/> No  | <i>Explain why this was not done</i>                   |

#### 5. Long-term evolution and hysteresis of the Hall signal.

Temporal evolution of the Hall effect

For instance,  $V_{\text{Hall}}(t)$  or  $\mu_{\text{Hall}}(t)$  data Yes *State where this can be found in the manuscript* No *Explain why this is not reported*

Hysteresis in Hall measurements

 Yes *State where this can be found in the manuscript* No *Explain why this is not reported*6. Apparent frequency dependences,  $V_{\text{Hall}}(f)$  or  $\mu_{\text{Hall}}(f)$  (only for a.c.-Hall measurements using a B-field oscillating at freq.  $f$ ).Dependence of  $V_{\text{Hall}}$  or  $\mu_{\text{Hall}}$  on the frequency  $f$  of B field Yes *State where this can be found in the manuscript* No *Explain why this is not reported* Elsewhere *Include a reference to your prior paper for the same system/material(s)*

## 7. Including raw Hall data in the publication.

Raw data for the best/representative sample

For instance,  $V_{\text{Hall}}$  or  $R_{\text{Hall}}$ . A reader should be able to verify the reported Hall mobility calculation Yes *State where this information can be found in the manuscript* No *Explain why this is not reported* Elsewhere *Include a reference to your prior paper for the same system/material(s)*

## 8. Providing a sufficiently detailed description of the studied devices.

Contact geometry and relevant dimensions

All dimensions or detailed image included

 Yes *State where this information can be found in the manuscript* No *Explain why this is not reported*

Device architecture (cross-section) and origin of mobile charges

 Yes *State where this information can be found in the manuscript* No *Explain why this is not reported*

Device photos and/or sketches

Image of the reported key device with a scale bar

 Yes *State where this information can be found in the manuscript* No *Explain why this is not reported***Additional Comments/Notes:****Further reading:**

1. Bruevich, V. & Podzorov, V. TABLE: Reporting Hall effect measurements of the charge carrier mobility in emergent materials. (ver. 2). Zenodo. <https://doi.org/10.5281/zenodo.8303147> (2023).
2. Ellmer, K. in *Characterization of Materials* (ed. E. N. Kaufmann), Ch. Hall Effect and Conductivity Measurements in Semiconductor Crystals and Thin Films, 564-579 (John Wiley & Sons, 2012).
3. Chen, Y., Yi, H. T. & Podzorov, V. High-Resolution ac Measurements of the Hall Effect in Organic Field-Effect Transistors, *Phys. Rev. Appl.* **5**, 034008 (2016).
4. Chwang, R., Smith, B. J. & Crowell, C. R. Contact size effects on the van der Pauw method for resistivity and Hall coefficient measurement, *Solid-State Electron.* **17**, 1217-1227 (1974).
5. Montgomery, H. C. Method for Measuring Electrical Resistivity of Anisotropic Materials, *J. Appl. Phys.* **42**, 2971-2975 (1971).
6. Low Level Measurements Handbook (7th Edition), Keithley Instruments, [www.tek.com/en/documents/product-article/keithley-low-level-measurements-handbook---7th-edition](http://www.tek.com/en/documents/product-article/keithley-low-level-measurements-handbook---7th-edition), acc. Nov. 2023.
